# Supplementary material for: Analyzing microglial phenotypes across neuropathologies: a practical guide
Source: Springer Nature journal article supplement (doi:10.1007/s00401-021-02370-8), 2021-10-08
Supplement: 401_2021_2370_MOESM1_ESM.pdf [file 401_2021_2370_MOESM1_ESM.pdf]

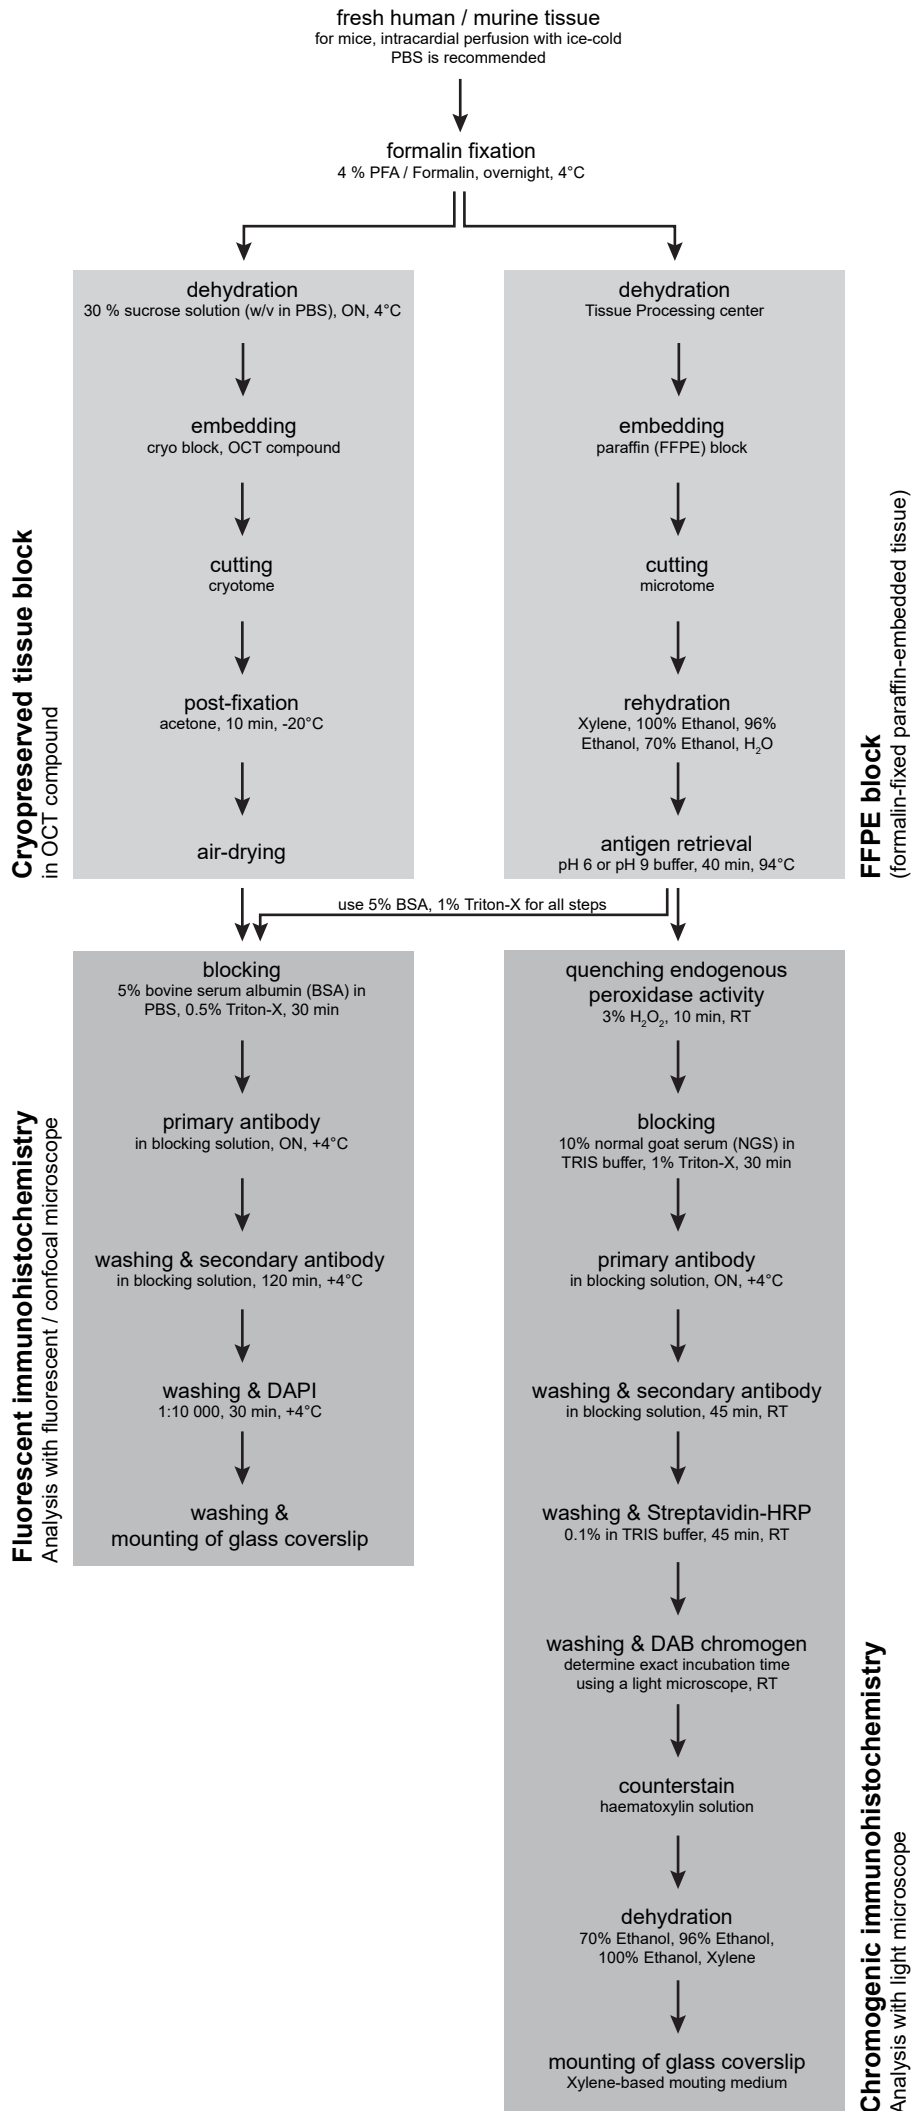

Supplementary Figure 1

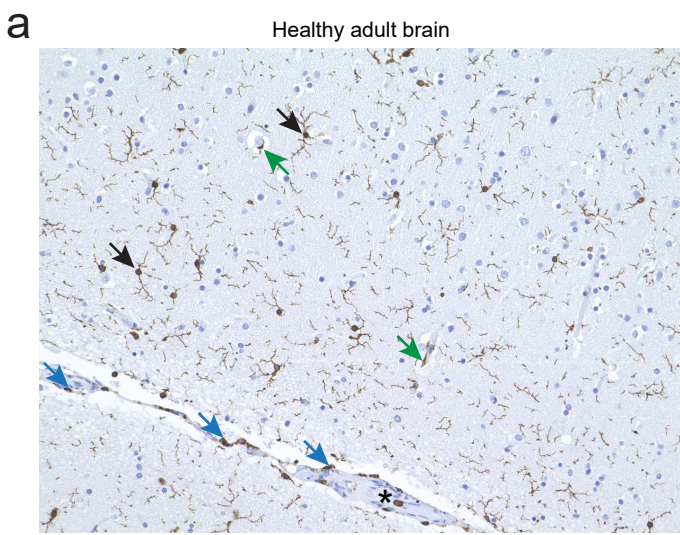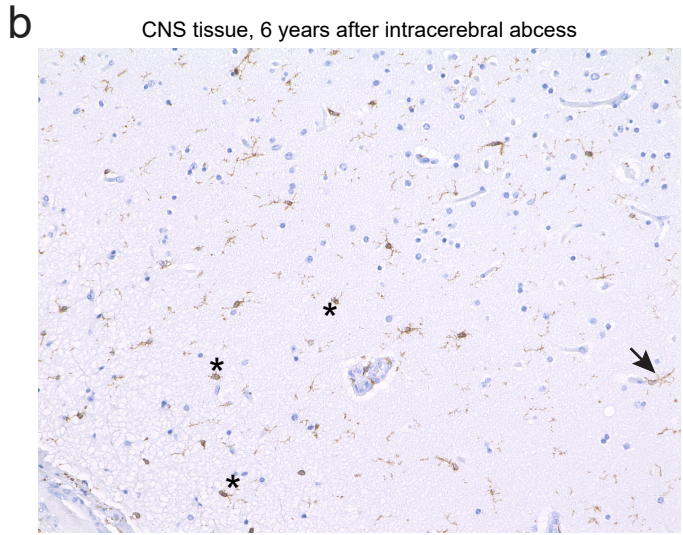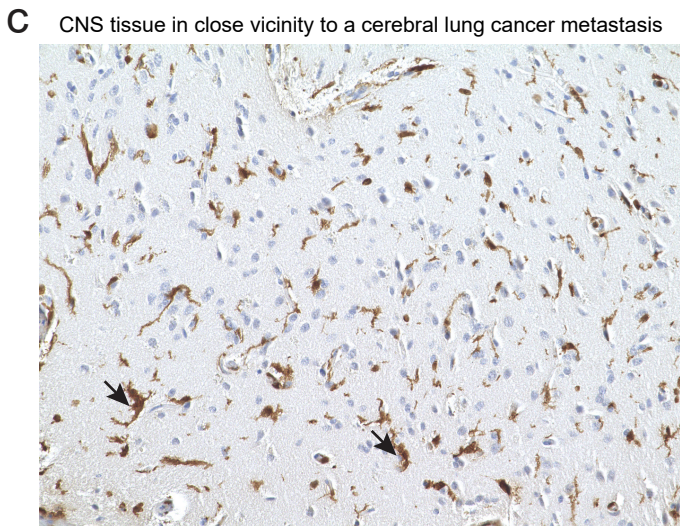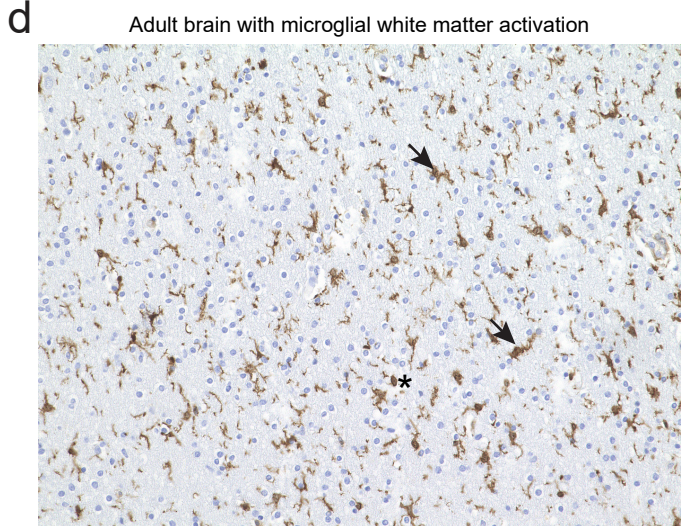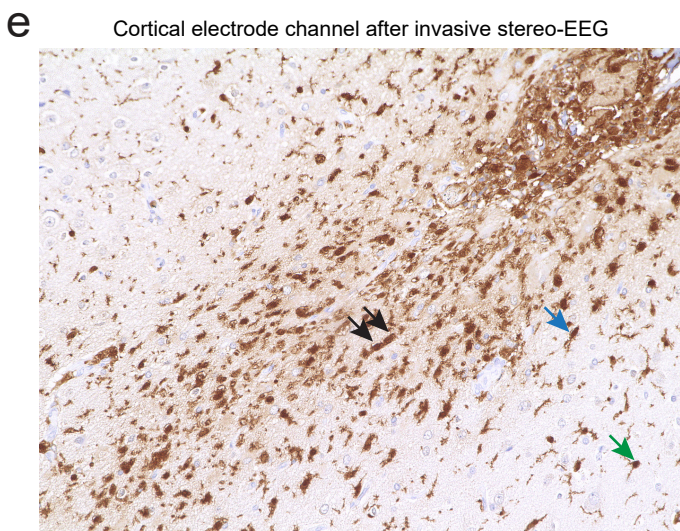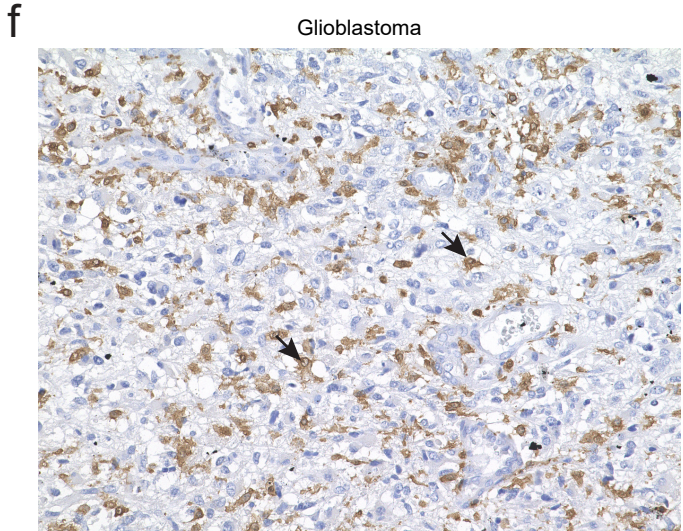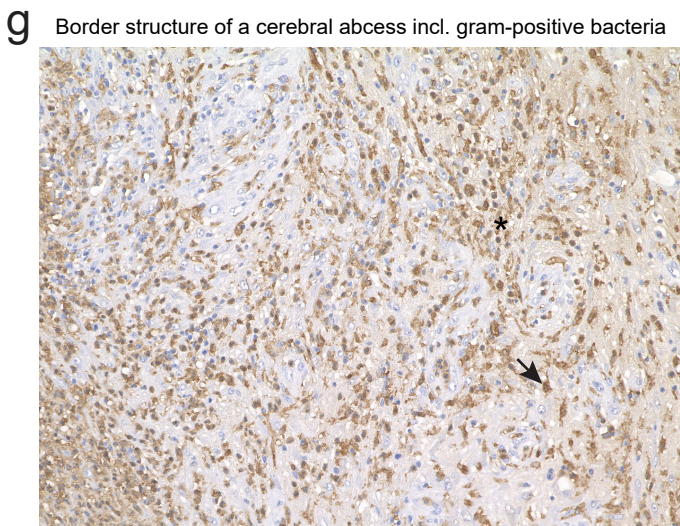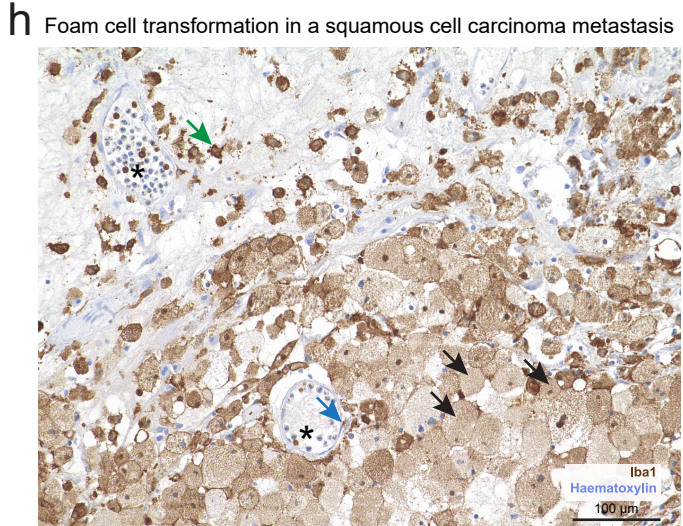

Supplementary Figure 2
